# Supplementary material for: Excessive consumption mechanism of hydrazine in the reaction with ReO4−: Re species evolution and ReO2·nH2O-catalyzed decomposition
Source: Royal Society of Chemistry journal article supplement (doi:10.1039/d2qi00606e), 2022-01-01
Supplement: d2qi00606e1.pdf [file d2qi00606e1.pdf]

## Supporting Information

### **Excessive consumption mechanism of hydrazine in the reaction with $\text{ReO}_4^-$ : Re species evolution and $\text{ReO}_2 \cdot n\text{H}_2\text{O}$ catalyzed decomposition**

Jinyang Kang,<sup>a,#</sup> Guikai Zhang,<sup>b,c,#</sup> Bo Chen,<sup>a</sup> Lang Chen,<sup>a</sup> Rulei Wu,<sup>a</sup> Xiaoyuan Zhou,<sup>a</sup> Jiahui Hang,<sup>a</sup> Chengbin Zheng,<sup>a,\*</sup> Chuanqin Xia.<sup>a,\*</sup>

<sup>a</sup> College of Chemistry, Sichuan University, Chengdu 610064, China

<sup>b</sup> Beijing Synchrotron Radiation Facility, Institute of High Energy Physics, Chinese Academy of Sciences, Beijing 100049, P. R. China

<sup>c</sup> University of Chinese Academy of Sciences, Beijing 100049, P. R. China

# These authors contributed equally to this work.

Corresponding authors:

\*E-mail: [xiachqin@163.com](mailto:xiachqin@163.com) (Chuanqin Xia)

\*E-mail: [abinscu@scu.edu.cn](mailto:abinscu@scu.edu.cn) (Chengbin Zheng)

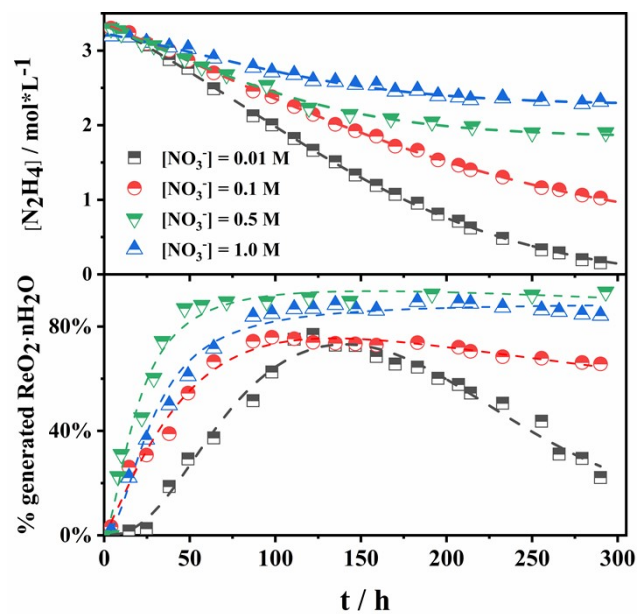

Figure S1. Time dependence of the hydrazine concentration and percentage of generated  $\text{ReO}_2 \cdot n\text{H}_2\text{O}$  in the reaction with varying nitrate ions concentrations :  $[\text{N}_2\text{H}_4] = 3.3\text{M}$ ,  $[\text{ReO}_4^-] = 8.6 \text{ mM}$ ,  $\text{pH} = 13$ ,  $T = 308 \text{ K}$

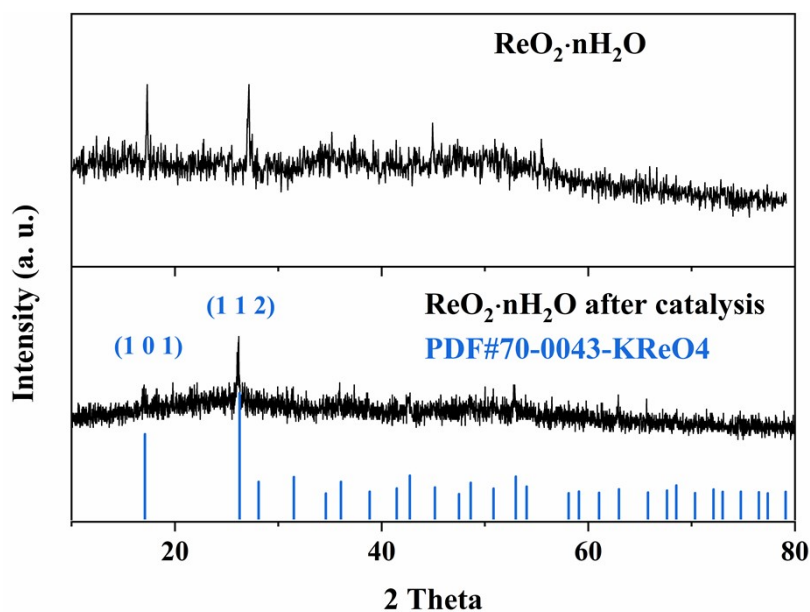

Figure S2. Powder XRD of  $\text{ReO}_2 \cdot n\text{H}_2\text{O}$  and  $\text{ReO}_2 \cdot n\text{H}_2\text{O}$  after catalyzed decomposition of hydrazine.

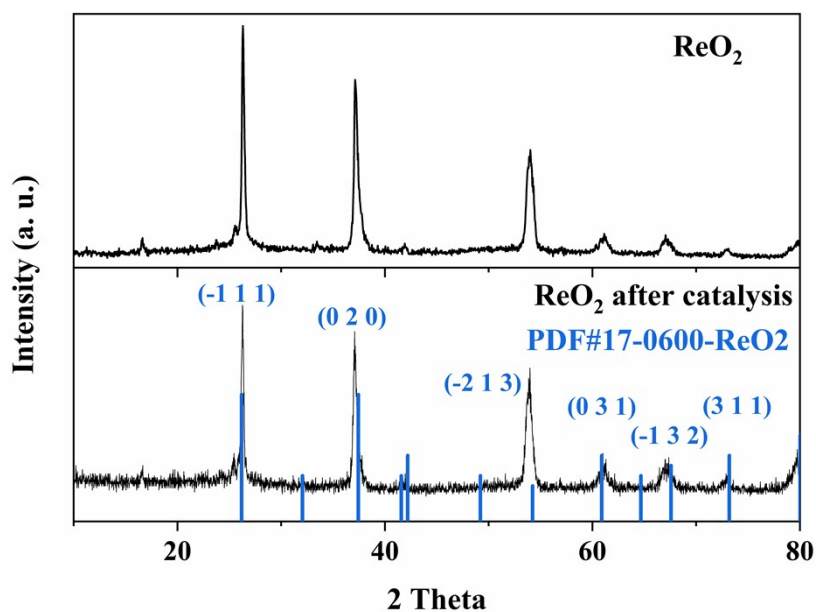

Figure S3. Powder XRD of  $\text{ReO}_2$  and  $\text{ReO}_2$  after catalyzed decomposition of hydrazine.

Table S1. Estimation of average oxidation state and fraction of Re(IV) and Re(VII) in reaction filtrate at different reaction times. The estimates are from linear interpolation between Re(IV) and Re(VII) references.

| Sample                   | $E_0(\text{eV})$ | Average oxidation state | IV fraction | VII fraction |
|--------------------------|------------------|-------------------------|-------------|--------------|
| $\text{KReO}_4$          | 10540.20         | 7.00                    | 0 %         | 100 %        |
| $\text{ReO}_2$           | 10538.81         | 4.00                    | 100 %       | 0 %          |
| 10 h                     | 10539.49         | 5.47                    | 51 %        | 49 %         |
| 46 h                     | 10538.81         | 4.00                    | 100 %       | 0 %          |
| 62 h                     | 10538.81         | 4.00                    | 100 %       | 0 %          |
| 240 h                    | 10539.49         | 5.47                    | 51 %        | 49 %         |
| 10 h ( $\text{NO}_3^-$ ) | 10539.36         | 5.19                    | 60 %        | 40 %         |

|                                       |          |      |       |      |
|---------------------------------------|----------|------|-------|------|
| 46 h (NO <sub>3</sub> <sup>-</sup> )  | 10538.95 | 4.30 | 90 %  | 10 % |
| 62 h (NO <sub>3</sub> <sup>-</sup> )  | 10538.81 | 4.00 | 100 % | 0 %  |
| 240 h (NO <sub>3</sub> <sup>-</sup> ) | 10538.81 | 4.00 | 100 % | 0 %  |

---
